# Supplementary material
Source: HighWire-hosted journal article supplement (https://erj.ersjournals.com/content/56/6/2002060)
Supplement: inline-supplementary-material-1 [file inline-supplementary-material-1.pdf]

## Supplementary Materials

### **Highly sensitive and specific diagnosis of coronavirus disease 19 (COVID-19) by reverse transcription multiple cross displacement amplification-labeled nanoparticles biosensor**

Shijun Li <sup>1</sup>, Weijia Jiang <sup>1</sup>, Junfei Huang <sup>1</sup>, Ying Liu <sup>1</sup>, Lijuan Ren <sup>1</sup>, Li Zhuang <sup>1</sup>,  
Qinni Zheng<sup>1</sup>, Ming Wang <sup>1</sup>, Rui Yang <sup>1</sup>, Yi Zeng <sup>1</sup>, Yi Wang <sup>2, 3\*</sup>

<sup>1</sup> Laboratory of Bacterial Infectious Disease of Experimental Center, Guizhou Provincial Center for Disease Control and Prevention, Guiyang 550004, P. R. China.

<sup>2</sup> Department of Respiratory Infection Disease, Beijing Pediatric Research Institute, Beijing Children's Hospital, Capital Medical University, National Center for Children's Health, Beijing 10045, P. R. China.

<sup>3</sup> Key Laboratory of Major Diseases in Children, Ministry of Education, Beijing Key Laboratory of Pediatric Respiratory Infection Disease, National Clinical Research Center for Respiratory Diseases, Beijing Children's Hospital, Capital Medical University, National Center for Children's Health, Beijing 10045, P. R. China.

\*Correspondence: **Yi Wang**

Department of Respiratory Infection Disease, Beijing Pediatric Research Institute, Beijing Children's Hospital, National Center for Children's Health, No. 56, Nanlishi Road, Xicheng District, Beijing 100045, China.

E-mail: [wildwolf0101@163.com](mailto:wildwolf0101@163.com)

## Tables

**Table S1.** The primers used in this study

| Primers name <sup>a</sup> | Sequences and modifications <sup>b</sup>              | Length <sup>c</sup> | Genes |
|---------------------------|-------------------------------------------------------|---------------------|-------|
| F1ab-F1                   | 5'-ACACTTAAAAACACAGTCTGTAC-3'                         | 23 nt               | F1ab  |
| F1ab-F2                   | 5'-AATTTAGCAAAACCAGCTACT-3'                           | 21 nt               |       |
| F1ab-CP1                  | 5'-GAAGCATGGGTTCGCGGAGTCGTCTGCGGTATGTGGAA-3'          | 38 mer              |       |
| F1ab-CP1*                 | 5'-Dig-GAAGCATGGGTTCGCGGAGTCGTCTGCGGTATGTGGAA-3'      | 38 mer              |       |
| F1ab-CP2                  | 5'-GTGCGGCACAGGCACTAGTATTATCATTGTAGATGTCAAAAGCC-3'    | 44 mer              |       |
| F1ab-C1                   | 5'-GAAGCATGGGTTCGCGGAGT-3'                            | 20 nt               |       |
| F1ab-C2                   | 5'-GTGCGGCACAGGCACTAGTA-3'                            | 20 nt               |       |
| F1ab-D1                   | 5'-TGATCACAACACTACAGCCAT-3'                           | 19 nt               |       |
| F1ab-D2                   | 5'-CTGATGTCGTATACAG-3'                                | 16 nt               |       |
| F1ab-R1                   | 5'-GATTGTGCATCAGCTGACT-3'                             | 19 nt               |       |
| F1ab-R2                   | 5'-GTTTGCGGTGTAAGTGCA-3'                              | 18 nt               |       |
| N-F1                      | 5'-GCTTCTACGCAGAAGGGA-3'                              | 18 nt               | N     |
| N-F2                      | 5'-AGGCTTCTTAGAAGCCTCAG-3'                            | 20 nt               |       |
| N-CP1                     | 5'-CTACTGCTGCCTGGAGTTGAATTCTTCTCGTTCCTCATCACG-3'      | 42 mer              |       |
| N-CP1*                    | 5'-FITC-CTACTGCTGCCTGGAGTTGAATTCTTCTCGTTCCTCATCACG-3' | 42 mer              |       |
| N-CP2                     | 5'-TGCTTGACAGATTGAACCAGCTGTGACAGTTTGGCCTTGTT-3'       | 41 mer              |       |
| N-C1                      | 5'-CTACTGCTGCCTGGAGTTGAAT-3'                          | 22 nt               |       |
| N-C2                      | 5'-TGCTTGACAGATTGAACCAGCT-3'                          | 22 nt               |       |
| N-D1                      | 5'-TCTTGAACGTGTGCGACTA-3'                             | 19 nt               |       |
| N-D2                      | 5'-TGAGAGCAAAATGTCTGGT-3'                             | 19 nt               |       |
| N-R1                      | 5'-CATTCTAGCAGGAGAAGTT-3'                             | 19 nt               |       |
| N-R2                      | 5'-ATGCTGCTCTTGCTTTGCT-3'                             | 19 nt               |       |

<sup>a</sup> F1ab, open reading frame 1a/b; N, nucleoprotein gene; F1ab-CP1\*, 5'-labeled with Dig when used in RT-MCDA-BS assay; N-CP1\*, 5'-labeled with FITC when used in RT-MCDA-BS assay.

<sup>b</sup> Dig, digoxigenin; FITC, fluorescein isothiocyanate.

<sup>c</sup> mer, monomeric unit; nt, nucleotide.

**Table S2.** The pathogens used in this study

| Strains                            | Serotypes (subtypes) | No. of strains | RT-LAMP-NBS |
|------------------------------------|----------------------|----------------|-------------|
| Positive control                   | Unidentified         | 1              | P           |
| <i>Coronavirus</i>                 | HKU1                 | 1              | N           |
| <i>Influenza Virus A</i>           | H1N1                 | 2              | N           |
| <i>Influenza Virus A</i>           | H1N2                 | 1              | N           |
| <i>Influenza Virus A</i>           | H5                   | 9              | N           |
| <i>Influenza Virus A</i>           | H5N8                 | 1              | N           |
| <i>Influenza Virus A</i>           | H4N6                 | 1              | N           |
| <i>Influenza Virus A</i>           | H7N9                 | 1              | N           |
| <i>Influenza Virus B</i>           | Unidentified         | 3              | N           |
| <i>Syncytial Virus</i>             | Unidentified         | 1              | N           |
| <i>Human Adenovirus</i>            | Unidentified         | 2              | N           |
| <i>Parainfluenza Virus</i>         | Unidentified         | 1              | N           |
| <i>Bocavirus</i>                   | Unidentified         | 1              | N           |
| <i>Coxsackievirus</i>              | CAV16                | 1              | N           |
| <i>Human enterovirus</i>           | EV71                 | 1              | N           |
| <i>Porcine circovirus</i>          | II                   | 1              | N           |
| <i>Swine fever virus</i>           | Unidentified         | 2              | N           |
| <i>Lelysted Virus</i>              | Unidentified         | 2              | N           |
| <i>Mycoplasma</i>                  | Unidentified         | 1              | N           |
| <i>Chlamydia</i>                   | Unidentified         | 1              | N           |
| <i>Lpneumophila</i>                | Unidentified         | 1              | N           |
| <i>Pseudomonas aeruginosa</i>      | Unidentified         | 1              | N           |
| <i>Staphylococcus aureus</i>       | Unidentified         | 1              | N           |
| <i>Staphylococcus epidermidis</i>  | Unidentified         | 1              | N           |
| <i>Staphylococcus saprophytics</i> | Unidentified         | 1              | N           |
| <i>Klebsiella pneumoniae</i>       | Unidentified         | 1              | N           |
| <i>Neisseria meningitidis</i>      | Unidentified         | 1              | N           |
| <i>Acinetobacter baumannii</i>     | Unidentified         | 1              | N           |
| <i>Enterococcus faecalis</i>       | Unidentified         | 1              | N           |
| <i>Enterococcus faecium</i>        | Unidentified         | 1              | N           |
| <i>Shigella flexneria</i>          | Unidentified         | 1              | N           |
| <i>Listeria monocytogenes</i>      | Unidentified         | 1              | N           |
| <i>Staphylococcus suis</i>         | Unidentified         | 1              | N           |
| <i>Bacillus cereus</i>             | Unidentified         | 1              | N           |
| <i>Enterotoxigenic E. coli</i>     | Unidentified         | 1              | N           |
| <i>Salmonella</i>                  | Unidentified         | 1              | N           |
| <i>Streptococcus pneumonia</i>     | Unidentified         | 1              | N           |
| <i>Vibrio parahemolyticus</i>      | Unidentified         | 1              | N           |
| <i>Candida tropicalis</i>          | Unidentified         | 1              | N           |

|                              |              |   |   |
|------------------------------|--------------|---|---|
| <i>Cryptoccus neo formas</i> | Unidentified | 1 | N |
| <i>Candida albicans</i>      | Unidentified | 1 | N |

Notes: Only positive control (5x10<sup>3</sup> copies each of F1ab-plasmid and np-plsmid) could be detected by the COVID-19 RT-MCDA-BS technique, indicating the extremely high selectivity of this method.

**Table S3.** Detection results of MCDA-BS for different types of samples

| Sample number <sup>a</sup> | Sample type     | Result of RT-PCR <sup>b</sup> | Ct value of RT-PCR <sup>c</sup> | Judgment result of MCDA-BS | Results of MCDA-BS |   | Patient status |
|----------------------------|-----------------|-------------------------------|---------------------------------|----------------------------|--------------------|---|----------------|
|                            |                 |                               |                                 |                            | F lab              | N |                |
| S1                         | Faeces          | Positive                      | 34.3                            | Positive                   | +                  | + | Convalescent   |
| S2                         | Pharyngeal swab | Positive                      | 36.6                            | Positive                   | +                  | + | Convalescent   |
| S3                         | Nasal swab      | Negative                      | —                               | Negative                   | —                  | — | Convalescent   |
| S4                         | Faeces          | Positive                      | 35.4                            | Positive                   | +                  | — | Convalescent   |
| S5                         | Faeces          | Positive                      | 33.7                            | Positive                   | +                  | + | Convalescent   |
| S6                         | Faeces          | Negative                      | —                               | Negative                   | —                  | — | Convalescent   |
| S7                         | Faeces          | Negative                      | —                               | Negative                   | —                  | — | Convalescent   |
| S8                         | Faeces          | Positive                      | 36.2                            | Positive                   | +                  | — | Convalescent   |
| S9                         | Pharyngeal swab | Negative                      | —                               | Negative                   | —                  | — | Convalescent   |
| S10                        | Nasal swab      | Negative                      | —                               | Negative                   | —                  | — | Convalescent   |
| S11                        | Pharyngeal swab | Negative                      | —                               | Negative                   | —                  | — | Convalescent   |
| S12                        | Anal swab       | Negative                      | —                               | Negative                   | —                  | — | Convalescent   |
| S13                        | Anal swab       | Negative                      | —                               | Negative                   | —                  | — | Convalescent   |
| S14                        | Faeces          | Negative                      | —                               | Negative                   | —                  | — | Convalescent   |
| S15                        | Faeces          | Negative                      | —                               | Negative                   | —                  | — | Convalescent   |
| S16                        | Faeces          | Negative                      | —                               | Negative                   | —                  | — | Convalescent   |
| S17                        | Pharyngeal swab | Negative                      | —                               | Negative                   | —                  | — | Convalescent   |
| S18                        | Pharyngeal swab | Negative                      | —                               | Negative                   | —                  | — | Convalescent   |
| S19                        | Faeces          | Negative                      | —                               | Negative                   | —                  | — | Convalescent   |
| S20                        | Anal swab       | Negative                      | 41.8                            | Positive                   | +                  | + | Convalescent   |
| S21                        | Pharyngeal swab | Negative                      | —                               | Negative                   | —                  | — | Convalescent   |
| S22                        | Anal swab       | Negative                      | —                               | Negative                   | —                  | — | Convalescent   |
| S23                        | Anal swab       | Negative                      | —                               | Negative                   | —                  | — | Convalescent   |
| S24                        | Anal swab       | Negative                      | 41.9                            | Positive                   | —                  | + | Convalescent   |
| S25                        | Nasal swab      | Negative                      | —                               | Negative                   | —                  | — | Convalescent   |
| S26                        | Nasal swab      | Negative                      | —                               | Negative                   | —                  | — | Convalescent   |
| S27                        | Pharyngeal swab | Positive                      | 35.2                            | Positive                   | +                  | + | Convalescent   |
| S28                        | Pharyngeal swab | Positive                      | 34.3                            | Positive                   | +                  | + | Convalescent   |
| S29                        | Nasal swab      | Negative                      | —                               | Negative                   | —                  | — | Convalescent   |
| S30                        | Anal swab       | Negative                      | —                               | Negative                   | —                  | — | Convalescent   |
| S31                        | Nasal swab      | Negative                      | —                               | Negative                   | —                  | — | Convalescent   |
| S32                        | Anal swab       | Negative                      | —                               | Negative                   | —                  | — | Convalescent   |
| S33                        | Pharyngeal swab | Negative                      | —                               | Negative                   | —                  | — | Convalescent   |
| S34                        | Anal swab       | Negative                      | —                               | Negative                   | —                  | — | Convalescent   |
| S35                        | Nasal swab      | Negative                      | —                               | Negative                   | —                  | — | Convalescent   |
| S36                        | Anal swab       | Negative                      | —                               | Negative                   | —                  | — | Convalescent   |
| S37                        | Nasal swab      | Negative                      | —                               | Negative                   | —                  | — | Convalescent   |
| S38                        | Anal swab       | Negative                      | —                               | Negative                   | —                  | — | Convalescent   |

|      |                 |          |      |          |   |   |              |
|------|-----------------|----------|------|----------|---|---|--------------|
| S39  | Pharyngeal swab | Negative | —    | Negative | — | — | Convalescent |
| S40  | Anal swab       | Negative | —    | Negative | — | — | Convalescent |
| S41  | Pharyngeal swab | Negative | —    | Negative | — | — | Convalescent |
| S42  | Anal swab       | Negative | —    | Negative | — | — | Convalescent |
| S43  | Pharyngeal swab | Negative | —    | Negative | — | — | Convalescent |
| S44  | Anal swab       | Negative | —    | Negative | — | — | Convalescent |
| S45  | Nasal swab      | Negative | —    | Negative | — | — | Convalescent |
| S46  | Anal swab       | Negative | —    | Negative | — | — | Convalescent |
| S47  | Pharyngeal swab | Negative | —    | Negative | — | — | Convalescent |
| S48  | Anal swab       | Positive | 33.3 | Positive | + | + | Convalescent |
| S49  | Pharyngeal swab | Negative | —    | Negative | — | — | Convalescent |
| S50  | Anal swab       | Positive | 34.5 | Positive | + | + | Convalescent |
| S51  | Pharyngeal swab | Negative | —    | Negative | — | — | Convalescent |
| S52  | Anal swab       | Negative | —    | Negative | — | — | Convalescent |
| S53  | Pharyngeal swab | Negative | —    | Negative | — | — | Convalescent |
| S54  | Pharyngeal swab | Negative | —    | Negative | — | — | Convalescent |
| S55  | Pharyngeal swab | Positive | 30.2 | Positive | + | + | Acute phase  |
| S56  | Pharyngeal swab | Positive | 32.4 | Positive | + | — | Acute phase  |
| S57  | Pharyngeal swab | Positive | 29.4 | Positive | + | + | Acute phase  |
| S58* | Pharyngeal swab | Positive | 35.9 | Positive | + | + | Acute phase  |
| S59  | Pharyngeal swab | Positive | 25.4 | Positive | + | + | Acute phase  |
| S60  | Pharyngeal swab | Positive | 26.6 | Positive | + | + | Acute phase  |
| S61  | Pharyngeal swab | Positive | 29.3 | Positive | + | + | Acute phase  |
| S62  | Pharyngeal swab | Positive | 31.3 | Positive | + | — | Acute phase  |
| S63  | Pharyngeal swab | Positive | 28.4 | Positive | + | + | Acute phase  |
| S64  | Pharyngeal swab | Positive | 29.6 | Positive | + | + | Acute phase  |
| S65  | Pharyngeal swab | Positive | 30   | Positive | + | + | Acute phase  |

<sup>a</sup> S58: this sample was collected from a asymptomatic individual.

<sup>b</sup> Positive: Ct <37; Negative: Ct>40 or no Ct.

<sup>c</sup> '—': no Ct.

**Table S4.** Detection results of COVID-19 RT-MCDA-BS method for non-COVID-19 samples

| Sample number | Sample type     | Result of COVID-19 RT-PCR | Result of COVID-19 RT-MCDA-BS | Confirmed pathogens* |
|---------------|-----------------|---------------------------|-------------------------------|----------------------|
| S1            | Pharyngeal swab | —                         | —                             | Influenza A virus    |
| S2            | Pharyngeal swab | —                         | —                             | Influenza A virus    |
| S3            | Pharyngeal swab | —                         | —                             | Influenza A virus    |
| S4            | Pharyngeal swab | —                         | —                             | Influenza A virus    |
| S5            | Pharyngeal swab | —                         | —                             | Influenza A virus    |
| S6            | Pharyngeal swab | —                         | —                             | Influenza A virus    |
| S7            | Pharyngeal swab | —                         | —                             | Influenza A virus    |
| S8            | Pharyngeal swab | —                         | —                             | Influenza A virus    |
| S9            | Pharyngeal swab | —                         | —                             | Influenza A virus    |
| S10           | Pharyngeal swab | —                         | —                             | Influenza A virus    |
| S11           | Pharyngeal swab | —                         | —                             | Influenza A virus    |
| S12           | Pharyngeal swab | —                         | —                             | Influenza A virus    |
| S13           | Pharyngeal swab | —                         | —                             | Influenza A virus    |
| S14           | Pharyngeal swab | —                         | —                             | Influenza A virus    |
| S15           | Pharyngeal swab | —                         | —                             | Influenza A virus    |
| S16           | Pharyngeal swab | —                         | —                             | Influenza A virus    |
| S17           | Pharyngeal swab | —                         | —                             | Influenza A virus    |
| S18           | Pharyngeal swab | —                         | —                             | Others               |
| S19           | Pharyngeal swab | —                         | —                             | Others               |
| S20           | Pharyngeal swab | —                         | —                             | Others               |
| S21           | Pharyngeal swab | —                         | —                             | Others               |
| S22           | Pharyngeal swab | —                         | —                             | Others               |
| S23           | Pharyngeal swab | —                         | —                             | Others               |
| S24           | Pharyngeal swab | —                         | —                             | Others               |
| S25           | Pharyngeal swab | —                         | —                             | Others               |
| S26           | Pharyngeal swab | —                         | —                             | Others               |
| S27           | Pharyngeal swab | —                         | —                             | Others               |
| S28           | Pharyngeal swab | —                         | —                             | Others               |
| S29           | Pharyngeal swab | —                         | —                             | Others               |
| S30           | Pharyngeal swab | —                         | —                             | Others               |
| S31           | Pharyngeal swab | —                         | —                             | Others               |
| S32           | Pharyngeal swab | —                         | —                             | Others               |
| S33           | Pharyngeal swab | —                         | —                             | Others               |
| S34           | Pharyngeal swab | —                         | —                             | Others               |
| S35           | Pharyngeal swab | —                         | —                             | Others               |
| S36           | Pharyngeal swab | —                         | —                             | Others               |
| S37           | Pharyngeal swab | —                         | —                             | Others               |
| S38           | Pharyngeal swab | —                         | —                             | Others               |
| S39           | Pharyngeal swab | —                         | —                             | Others               |
| S40           | Pharyngeal swab | —                         | —                             | Others               |
| S41           | Pharyngeal swab | —                         | —                             | Others               |

|     |                 |   |   |        |
|-----|-----------------|---|---|--------|
| S42 | Pharyngeal swab | — | — | Others |
| S43 | Pharyngeal swab | — | — | Others |
| S44 | Pharyngeal swab | — | — | Others |
| S45 | Pharyngeal swab | — | — | Others |
| S46 | Pharyngeal swab | — | — | Others |
| S47 | Pharyngeal swab | — | — | Others |
| S48 | Pharyngeal swab | — | — | Others |
| S49 | Pharyngeal swab | — | — | Others |
| S50 | Pharyngeal swab | — | — | Others |
| S51 | Pharyngeal swab | — | — | Others |
| S52 | Pharyngeal swab | — | — | Others |
| S53 | Pharyngeal swab | — | — | Others |
| S54 | Pharyngeal swab | — | — | Others |
| S55 | Pharyngeal swab | — | — | Others |
| S56 | Pharyngeal swab | — | — | Others |
| S57 | Pharyngeal swab | — | — | Others |
| S58 | Pharyngeal swab | — | — | Others |
| S59 | Pharyngeal swab | — | — | Others |
| S60 | Pharyngeal swab | — | — | Others |
| S61 | Pharyngeal swab | — | — | Others |
| S62 | Pharyngeal swab | — | — | Others |
| S63 | Pharyngeal swab | — | — | Others |
| S64 | Pharyngeal swab | — | — | Others |
| S65 | Pharyngeal swab | — | — | Others |
| S66 | Pharyngeal swab | — | — | Others |
| S67 | Pharyngeal swab | — | — | Others |
| S68 | Pharyngeal swab | — | — | Others |
| S69 | Pharyngeal swab | — | — | Others |
| S70 | Pharyngeal swab | — | — | Others |
| S71 | Pharyngeal swab | — | — | Others |
| S72 | Pharyngeal swab | — | — | Others |
| S73 | Pharyngeal swab | — | — | Others |
| S74 | Pharyngeal swab | — | — | Others |
| S75 | Pharyngeal swab | — | — | Others |
| S76 | Pharyngeal swab | — | — | Others |
| S77 | Pharyngeal swab | — | — | Others |
| S78 | Pharyngeal swab | — | — | Others |
| S79 | Pharyngeal swab | — | — | Others |
| S80 | Pharyngeal swab | — | — | Others |
| S81 | Pharyngeal swab | — | — | Others |
| S82 | Pharyngeal swab | — | — | Others |
| S83 | Pharyngeal swab | — | — | Others |
| S84 | Pharyngeal swab | — | — | Others |
| S85 | Pharyngeal swab | — | — | Others |



|      |                 |   |   |        |
|------|-----------------|---|---|--------|
| S86  | Pharyngeal swab | — | — | Others |
| S87  | Pharyngeal swab | — | — | Others |
| S88  | Pharyngeal swab | — | — | Others |
| S89  | Pharyngeal swab | — | — | Others |
| S90  | Pharyngeal swab | — | — | Others |
| S91  | Pharyngeal swab | — | — | Others |
| S92  | Pharyngeal swab | — | — | Others |
| S93  | Pharyngeal swab | — | — | Others |
| S94  | Pharyngeal swab | — | — | Others |
| S95  | Pharyngeal swab | — | — | Others |
| S96  | Pharyngeal swab | — | — | Others |
| S97  | Pharyngeal swab | — | — | Others |
| S98  | Pharyngeal swab | — | — | Others |
| S99  | Pharyngeal swab | — | — | Others |
| S100 | Pharyngeal swab | — | — | Others |
| S101 | Pharyngeal swab | — | — | Others |
| S102 | Pharyngeal swab | — | — | Others |
| S103 | Pharyngeal swab | — | — | Others |
| S104 | Pharyngeal swab | — | — | Others |
| S105 | Pharyngeal swab | — | — | Others |
| S106 | Pharyngeal swab | — | — | Others |
| S107 | Pharyngeal swab | — | — | Others |
| S108 | Pharyngeal swab | — | — | Others |
| S109 | Pharyngeal swab | — | — | Others |
| S110 | Pharyngeal swab | — | — | Others |
| S111 | Pharyngeal swab | — | — | Others |
| S112 | Pharyngeal swab | — | — | Others |
| S113 | Pharyngeal swab | — | — | Others |
| S114 | Pharyngeal swab | — | — | Others |
| S115 | Pharyngeal swab | — | — | Others |
| S116 | Pharyngeal swab | — | — | Others |
| S117 | Pharyngeal swab | — | — | Others |
| S118 | Pharyngeal swab | — | — | Others |

\*Note: Influenza A virus includes H1N1, H3N2, H5N1,H7 subtype et, al; Others for Parainfluenza Virus, *Mycoplasma*, *Neisseria meningitidis* et, al.

## Figures

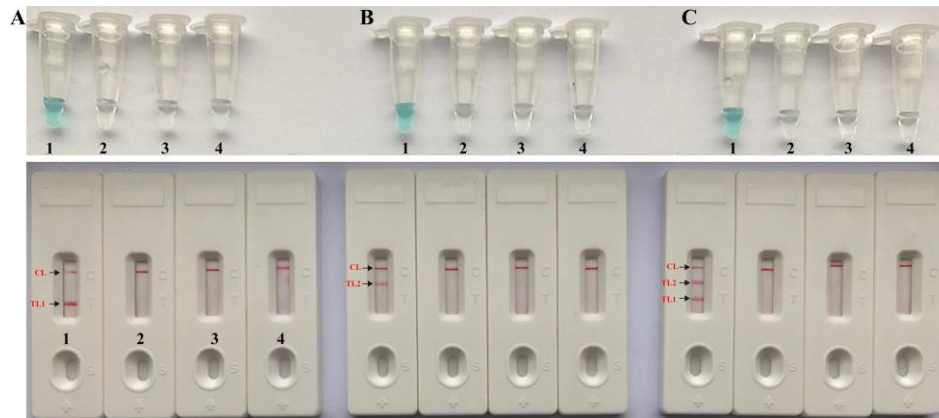

**Figure S1. Confirmation and detection of F1ab- and N-RT-MCDA products**

Color change of F1ab- (A, top row), N- (B, top row) and COVID-19 (C, top row) RT-MCDA tubes; BS applied for visual detection of F1ab- (A, bottom row), N- (B, bottom row) and COVID-19 (C, bottom row) RT-MCDA products. Tube A1 (BS A1), F1ab-RT-MCDA positive amplification ( $5 \times 10^3$  copies of F1ab-plasmids); Tube A2 (BS A2), F1ab-RT-MCDA negative amplification (H1N1); Tube A3 (BS A3), F1ab-RT-MCDA negative amplification (EV 71); Tube A4 (BS A4), Blank control (DW). Tube B1 (BS B1), N-RT-MCDA positive amplification ( $5 \times 10^3$  copies of N-plasmids); Tube B2 (BS B2), N-RT-MCDA negative amplification (H1N1); Tube B3 (BS B3), N-RT-MCDA negative amplification (EV 71); Tube B4 (BS B4), Blank control (DW). Tube C1 (BS C1), COVID-19 RT-MCDA positive amplification ( $5 \times 10^3$  copies of F1ab-plasmids and N-plasmids); Tube C2 (BS C2), COVID-19 RT-MCDA negative amplification (H1N1); Tube C3 (BS C3), COVID-19 RT-MCDA negative amplification (EV 71); Tube C4 (BS C4), Blank control (DW).

Note\*: H1N1, Influenza H1N1 virus; EV 71, Human enterovirus 71; DW, Distilled water.

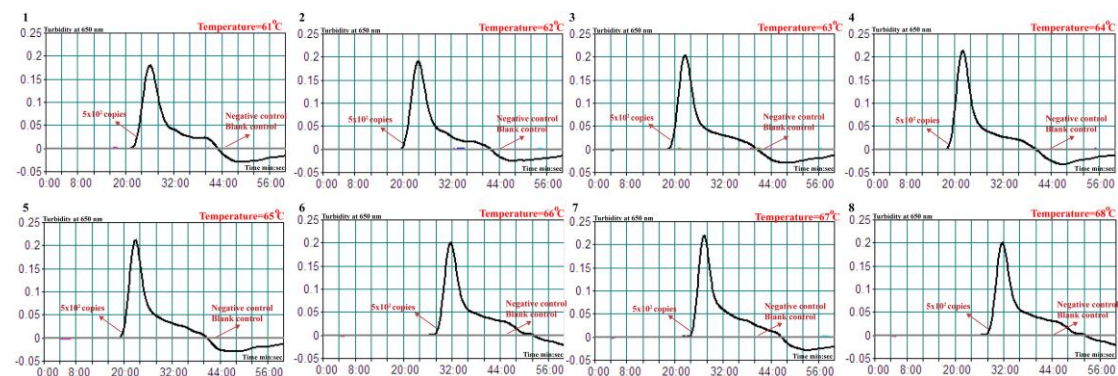

**Figure S2. Optimal amplification temperature for F1ab-RT-MCDA primer set**

The F1ab-RT-MCDA reactions for detection of F1ab gene of COVID-19 were monitored by real-time measurement of turbidity (LA320c). Turbidity of  $>0.1$  was considered to be positive as the threshold value was 0.1. Eight kinetic graphs (1-8) were yielded at different temperatures (61-68°C, 1°C intervals) with target template at the level of  $5 \times 10^2$  copies (F1ab-plamid) per reaction. The graphs from 63°C to 65°C showed faster amplification.

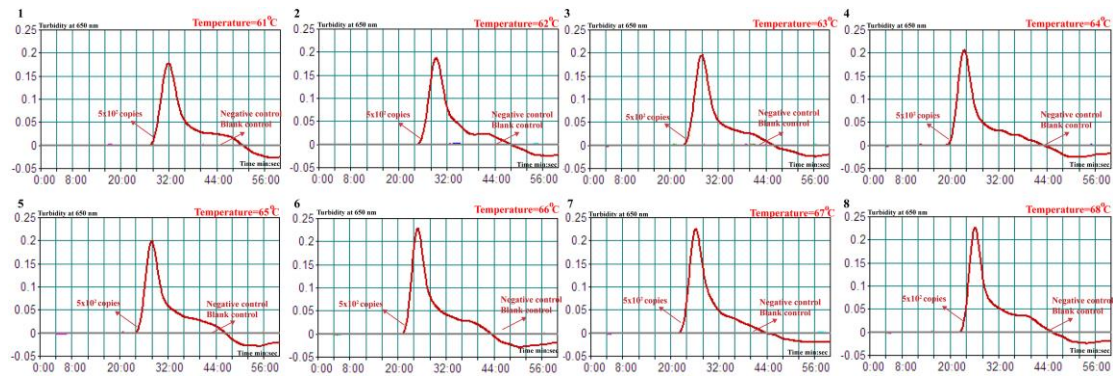

**Figure S3. Optimal amplification temperature for N-RT-MCDA primer set**

The N-RT-MCDA reactions for detection of N gene of COVID-19 were monitored by real-time measurement of turbidity (LA320c). Turbidity of  $>0.1$  was considered to be positive as the threshold value was 0.1. Eight kinetic graphs (1-8) were yielded at different temperatures (61-68°C, 1°C intervals) with target template at the level of  $5 \times 10^2$  copies (N-plasmid) per reaction. The graphs from 63°C to 65°C showed faster amplification.

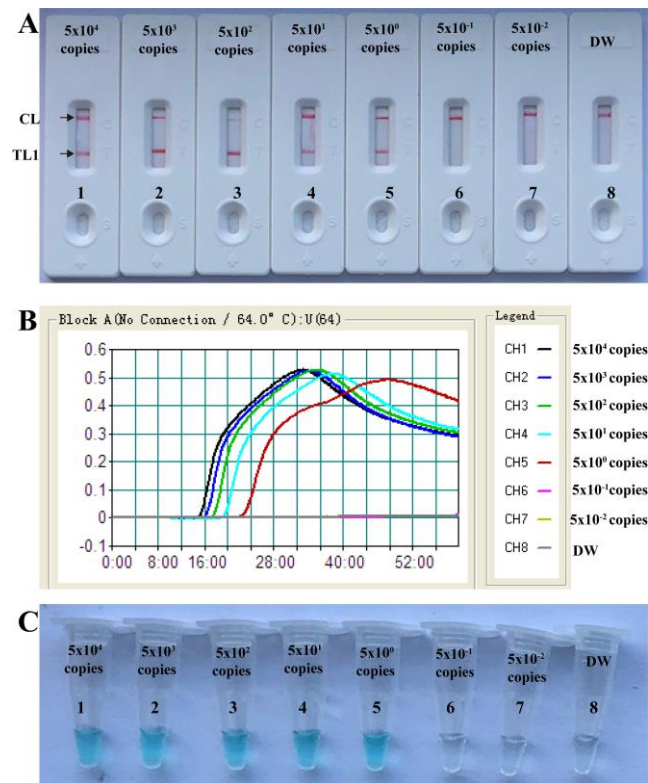

**Figure S4. Analytical sensitivity of F1ab-RT-MCDA-BS assay using serially diluted F1ab-plasmid templates**

A, BS applied for reporting the results; B, Real-time turbidity applied for reporting the results; C, VDR applied for reporting the results. BS (A)/Signals (B)/Tubes (C) 1-8 represented the F1ab-plasmid levels of  $5 \times 10^4$ ,  $5 \times 10^3$ ,  $5 \times 10^2$ ,  $5 \times 10^1$ ,  $5 \times 10^0$ ,  $5 \times 10^{-1}$ ,  $5 \times 10^{-2}$  copies per reaction and blank control (DW). The plasmid levels of  $5 \times 10^4$  to  $5 \times 10^0$  copies per reaction produced the positive reactions.

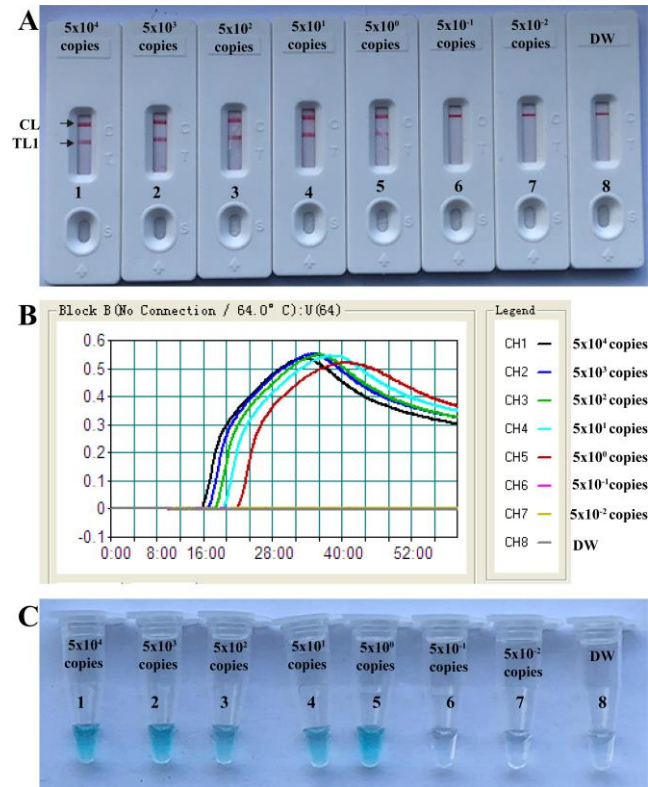

**Figure S5. Analytical sensitivity of N-RT-MCDA-BS assay using serially diluted N-plasmid templates**

A, BS applied for reporting the results; B, Real-time turbidity applied for reporting the results; C, VDR applied for reporting the results. BS (A)/Signals (B)/Tubes (C) 1-8 represented the N-plasmid levels of  $5 \times 10^4$ ,  $5 \times 10^3$ ,  $5 \times 10^2$ ,  $5 \times 10^1$ ,  $5 \times 10^0$ ,  $5 \times 10^{-1}$ ,  $5 \times 10^{-2}$  copies per reaction and blank control (DW). The plasmid levels of  $5 \times 10^4$  to  $5 \times 10^0$  copies per reaction produced the positive reactions.

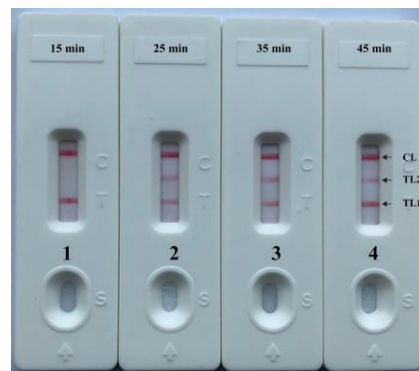

**Figure S6. The optimal duration of time required for COVID-19 RT-MCDA-BS assay**  
Four reaction times (A, 15 min; B, 25 min; C, 35 min; and D, 45 min) were tested and compared at 64 °C. COVID-19 RT-MCDA reactions were conducted using the LoD level of templates ( $5 \times 10^0$  copies of each of F1ab-plasmid and N-plasmid), and the templates at the LoD level could be detected when the RT-MCDA reaction only lasted for 25 min (Biosensor 2).
